# Supplementary material for: A photochemical determination of luminescence efficiency of upconverting nanoparticles
Source: publisher site journal article supplement (doi:10.3762/bjoc.15.260), 2019-11-11
Supplement: Additional file 1 [file 1860-5397-15-260-S1.pdf]

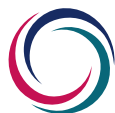

## Supporting Information

for

### **A photochemical determination of luminescence efficiency of upconverting nanoparticles**

Baptiste Amouroux, Clément Roux, Jean-Claude Micheau, Fabienne Gauffre and Christophe Coudret

*Beilstein J. Org. Chem.* **2019**, *15*, 2671–2677. [doi:10.3762/bjoc.15.260](https://doi.org/10.3762/bjoc.15.260)

### **Experimental details about the UCNPs syntheses, characterizations, photolysis experiments and detailed calculations**

## Table of contents

|                                                                           |     |
|---------------------------------------------------------------------------|-----|
| 1- General Procedure for the preparation of 21.8 nm- UCNP batch . . . . . | S2  |
| 2- UCNP's stoichiometry datas. . . . .                                    | S2  |
| 3- TEM analysis of UCNP batch. . . . .                                    | S3  |
| 4- XRD analysis of UCNP batch. . . . .                                    | S4  |
| 5- Photochromic actinometer . . . . .                                     | S4  |
| 6- Discoloration of DAE induced by 21.8 nm-UCNP . . . . .                 | S5  |
| 7- General procedure for the preparation of 35 nm- UCNPs . . . . .        | S6  |
| 8- Discoloration of DAE induced by 35 nm-UCNP. . . . .                    | S6  |
| 9- Control experiments. . . . .                                           | S9  |
| 10- Summary table . . . . .                                               | S9  |
| 11- References . . . . .                                                  | S10 |

## 1- General Procedure for the preparation of 21.8nm-UCNP batch

UCNP were prepared adapting the protocols of Li and Zhang<sup>2</sup> and Zhai et al.<sup>3</sup> Rare earth (RE) chloride hydrates were mixed in a oleic acid (OA): octadecene (ODE) (7:38) mixture and heated to 160 °C under Ar flush until a clear solution was obtained. To the cooled reaction mixture were slowly added freshly prepared solutions of NaOH (0.326 mM) and NH<sub>4</sub>F (0.5 mM) in MeOH via syringe pump at 0.4 mL min<sup>-1</sup>. Volatile compounds were then removed under Ar flush then the reaction mixture was brought to 300–310 °C for 90 minutes. Timer was started when temperature reached 300 °C. It should be noted that temperature never reached 310 °C but stayed at around 305 °C.

## 2- UCNP's stoichiometry datas

| UCNPs                       |                                                   |
|-----------------------------|---------------------------------------------------|
| Matrix                      | <i>NaYF<sub>4</sub></i>                           |
| n(RE)                       | <i>11.6 mmol</i>                                  |
| n(Y)                        | <i>7.9 mmol (68% RE)</i>                          |
| n(Yb)                       | <i>3.5 mmol (30% RE)</i>                          |
| n(Yb)                       | <i>0.23 mmol (2% RE)</i>                          |
| n(Na)/n(RE)                 | <i>4</i>                                          |
| n(F)/n(RE)                  | <i>5.5</i>                                        |
| V(OA) mL                    | <i>35</i>                                         |
| V(ODE) mL                   | <i>190</i>                                        |
| {Na+F} addition             | <i>Separated addition via double syringe pump</i> |
| Diameter                    | <i>21.8 nm</i>                                    |
| Area                        | <i>1.49 * 10<sup>3</sup> nm<sup>2</sup></i>       |
| Volume                      | <i>5.42 * 10<sup>3</sup> nm<sup>3</sup></i>       |
| Unit                        | cell volume                                       |
| U(NaYF <sub>4</sub> :Yb,Er) | <i>107.6 Å<sup>3</sup></i>                        |
| Z                           | <i>1.5</i>                                        |
| N(Yb/NP)                    | <i>22670</i>                                      |
| N(Er/NP)                    | <i>1510</i>                                       |

### 3- TEM analysis of UCNP batch

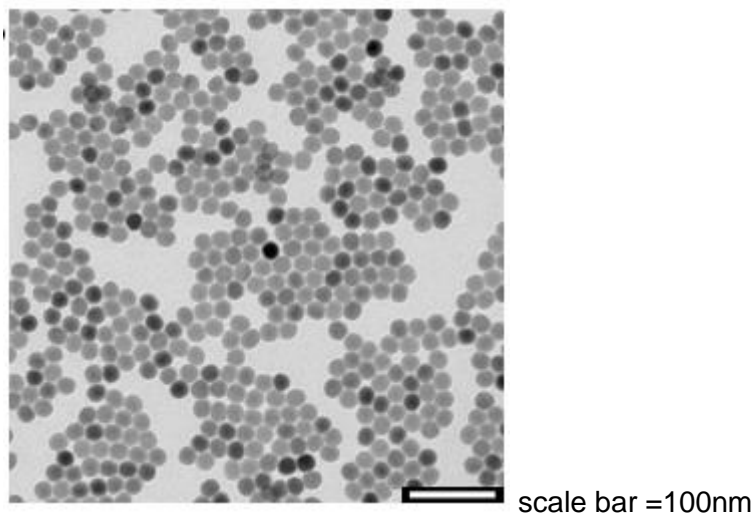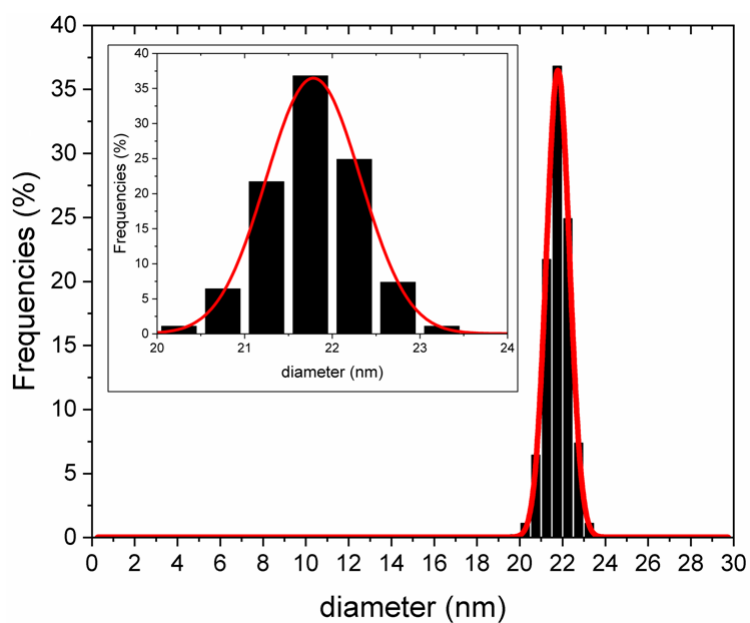

**Figure S3** : TEM analysis and size distribution of the studied UCNPs

UCNP synthesized are homogeneous in size and shape. We have assimilated them to a pseudo-sphere of a diameter of  $21.8 \pm 1.3$  nm (average size  $\pm$  FWHM)

#### 4- XRD analysis of UCNP batch

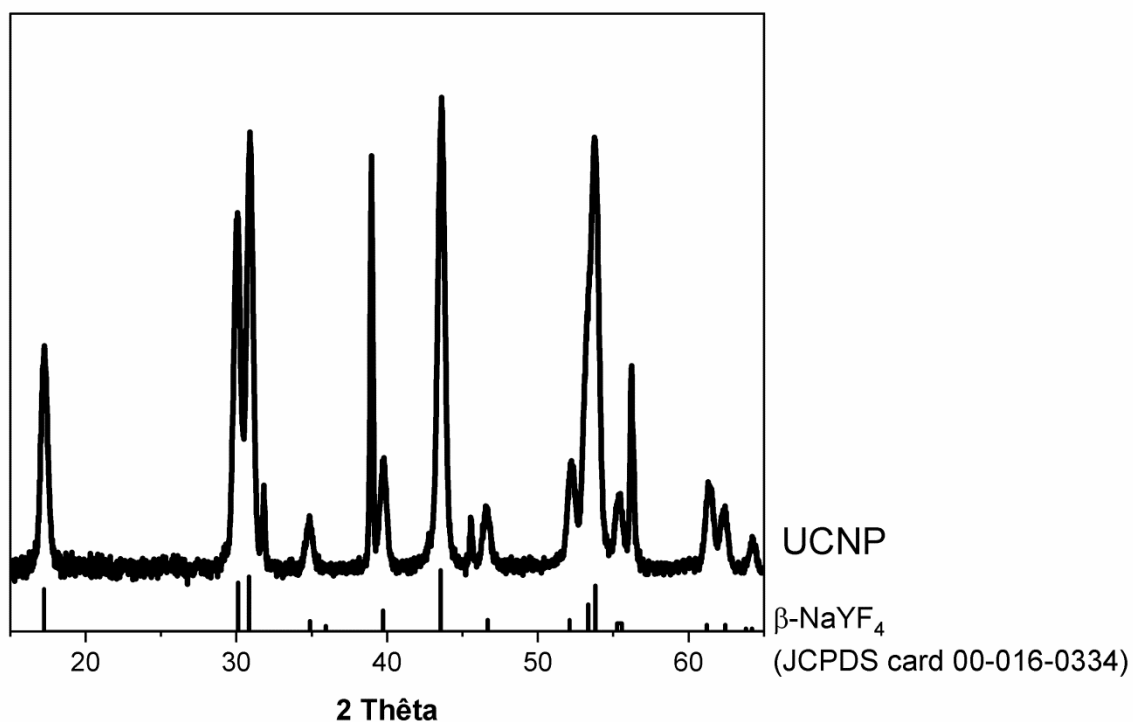

**Figure S4** : XRD analysis of the studied UCNP and comparison with the standard hexagonal phase  $\beta$ -NaYF<sub>4</sub> (JCPDS card 00-016-0334) .

#### 5- Photochromic actinometer

1,2-Bis(2,4-dimethyl-5-phenyl-3-thienyl)3,3,4,4,5,5-hexafluoro-1-cyclopentene ( $\geq 98\%$ , CAS: 172612-67-8) was obtained from TCI chemicals and used as received. The concentration of **1-c** was determined using the published value of its molar extinction coefficient at 562 nm ( $10900 \text{ L mol}^{-1}\text{cm}^{-1}$ ).<sup>1</sup>

## 6- Discoloration of DAE induced by 21.8 nm-UCNP

Quartz cell containing the mixture of DAE and UCNP (21.8nm) was placed in UV–visible spectrophotometer. Absorbance spectra were recorded in a kinetic mode, while the cell was irradiated from the side by a fibered collimated NIR laser.

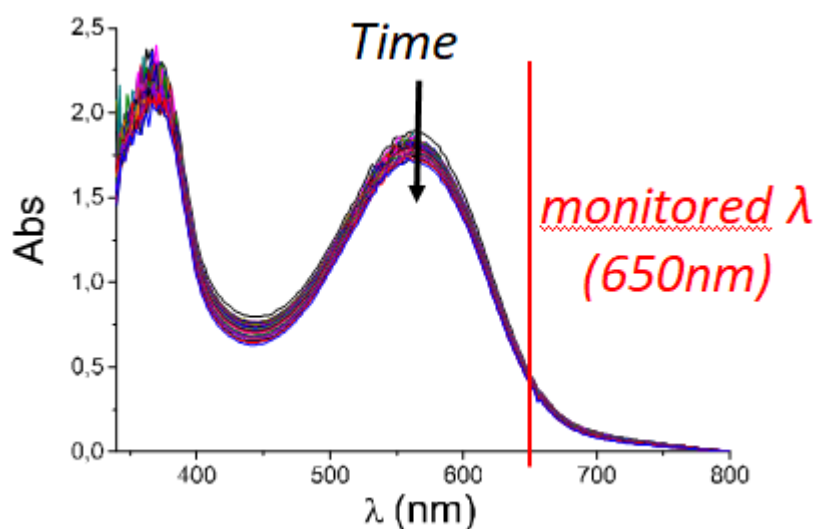

**Figure S6** : DAE discoloration induced by UCNP under 976m CW laser at 4.1 W (49 W cm<sup>-2</sup>).

This high absorbance has been selected to ensure total light absorption at 540 nm. A convenient parameter is the characteristic “optical thickness”<sup>4</sup>  $L$  defined from the rewritten Beer-Lambert law:

$$I = I_0 10^{-L}$$

as

$$L = \frac{1}{\epsilon_{540} [1c]}$$

L is therefore the inverse of the absorbance measured for an optical path of 1cm. Thus, an absorbance at 530nm of 2.1 (over 1cm) gives a characteristic length of 0.47 cm, comparable to the dimensions of the cuvette. On the other hand, a shift of the observation wavelength was necessary to optimize the monitoring conditions.

### 7- General procedure for the preparation of 35nm -UCNPs.

Larger NaYF<sub>4</sub>:Yb,Er UCNPs were prepared by applying the protocol described by Li and Zhang<sup>3</sup>, using a doping molar ratio of 80% Y, 18% Yb, 2% Er. TEM analyses give an average size of 35 nm

### 8- Discoloration of DAE induced by 35nm-UCNP

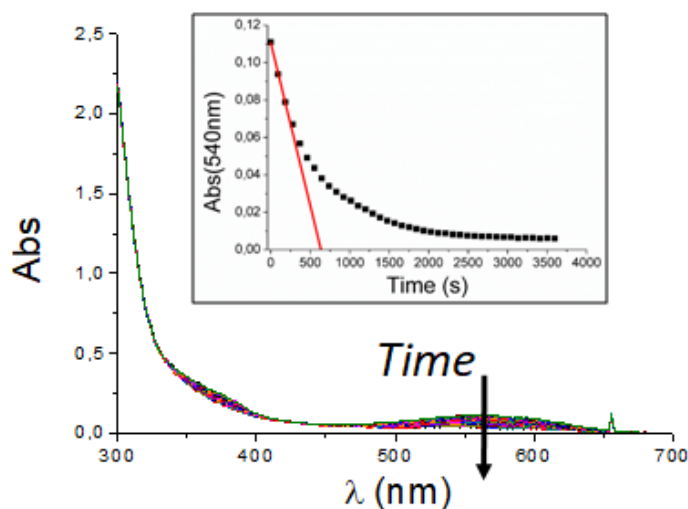

**Figure S8-1:** Photoisomerization of DAE induced by UCNP emission was monitored in diluted conditions:  $Abs(500-600nm) \approx 0.15$ . Complete kinetic is represented in the insert.

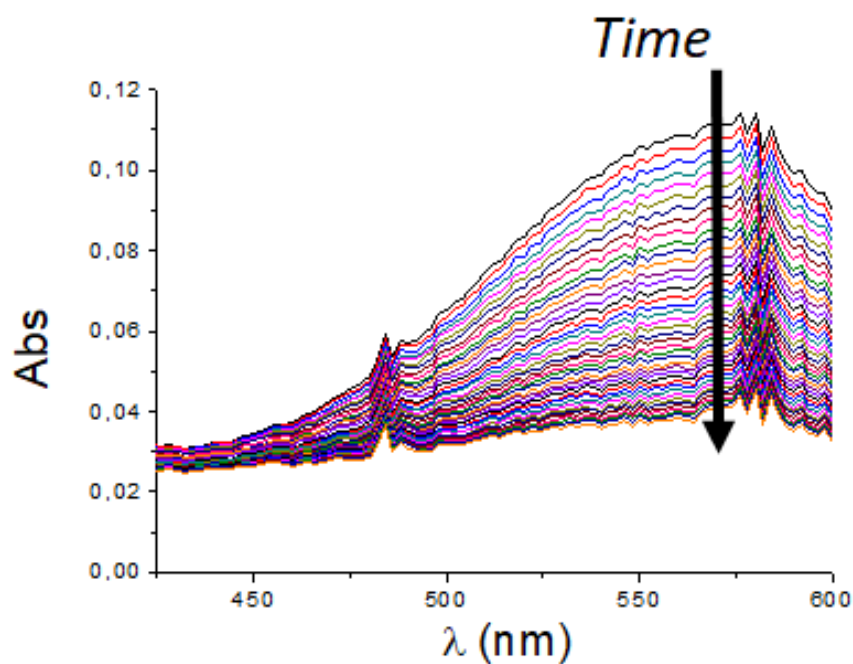

**Figure S8-2:** Photoisomerization of DAE induced by UCNP emission (zoom-in of the region of interest where only **1-c** absorbs).

In such conditions it is not possible to define simply the absorbed flux density<sup>4</sup>. Thus, no quantum yield could be determined. Nevertheless, the activity of the nanolamp could be determined: in this geometry, one single 35 nm-UCNP induces 20 dyes switching per second (ratio of the measured disappearance slope by the number of UCNP within the 976nm-irradiated volume).



## 9- Control experiments

### a- Impact of the spectrophotometer lamp

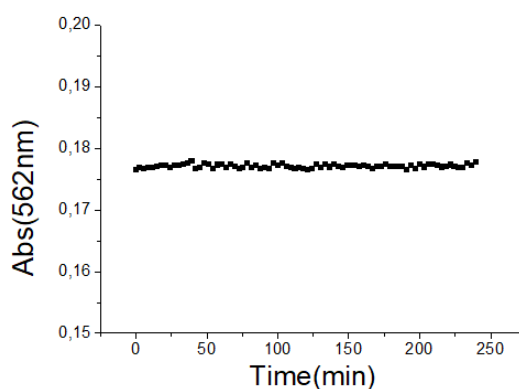

**Figure S8-a :** Time evolution of the absorbance of a mixture **1-c** and 35 nm-UCNP at 562 nm left in the spectrophotometer (no external light sources) ( $[1-c] = 1.6 \cdot 10^{-5} \text{ mol L}^{-1}$ ,  $[\text{UCNP}] = 11 \text{ g L}^{-1}$ )

### b-Impact of the laser

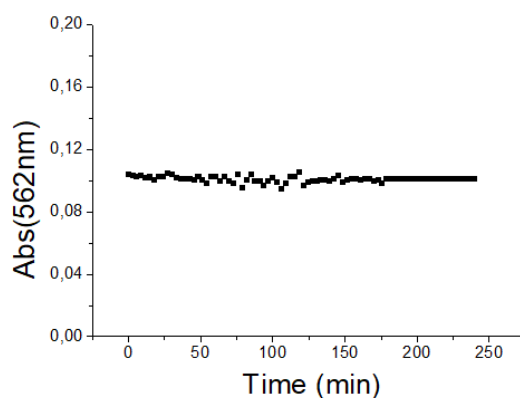

**Figure S9-b:** Time evolution of the absorbance of **1-c** at 562 nm under 980nm-laser irradiation ( $[1-c] = 9 \cdot 10^{-6} \text{ mol L}^{-1}$ ; P laser =  $29 \text{ W cm}^{-2}$ )

Neither the spectrophotometer nor the 980-laser induce significant dye transformation.

## 10- Summary table

| Step                     | parameter                                                     | symbol                              | unit                                 | value                         |
|--------------------------|---------------------------------------------------------------|-------------------------------------|--------------------------------------|-------------------------------|
| Photolysis of <b>1-c</b> | DAE <b>1-c</b> concentration                                  | [ <b>1-c</b> ]                      | mol L <sup>-1</sup>                  | 2.12 × 10 <sup>-4</sup>       |
|                          | <b>1-c</b> molar extinction coefficient at 650nm (monitoring) | ε <sub>650</sub>                    | L mol <sup>-1</sup> cm <sup>-1</sup> | 2154                          |
|                          | <b>1-c</b> molar extinction coefficient at 540nm              | ε <sub>540</sub>                    | L mol <sup>-1</sup> cm <sup>-1</sup> | 9784                          |
|                          | Volume of the DAE solution                                    | V                                   | L                                    | 1.96 × 10 <sup>-3</sup>       |
|                          | DAE opening quantum yield at 540nm                            | Φ <sub>CO</sub>                     | -                                    | 0.02                          |
|                          | DAE Absorbance at 540 nm (irradiation)                        | Abs <sub>540</sub>                  | -                                    | 2.07                          |
|                          | Optical length at 540 nm                                      | L                                   | cm                                   | 0.48                          |
|                          | Initial slope DAE photobleaching                              | -dAbs <sub>650</sub> /dt            | Abs s <sup>-1</sup>                  | 1.46 × 10 <sup>-5</sup>       |
|                          | DAE bleaching rate                                            | -d[ <b>1-c</b> ]/dt                 | mol L <sup>-1</sup> s <sup>-1</sup>  | 6.78 × 10 <sup>-9</sup>       |
|                          | <b>DAE consumption</b>                                        |                                     | <b>molecule s<sup>-1</sup></b>       | <b>8.00 × 10<sup>12</sup></b> |
| Incoming NIR energy      | Upconversion photon flux at 540nm                             | J <sub>0</sub>                      | photon s <sup>-1</sup>               | 4.00 × 10 <sup>14</sup>       |
|                          | Laser power at 976 nm (NIR)                                   | P                                   | W                                    | 4.7                           |
|                          | Laser power density at 976 nm (NIR)                           |                                     | W cm <sup>-2</sup>                   | 49                            |
|                          | Incident NIR photon flux                                      | J <sub>0</sub> <sup>NIR</sup>       | photon s <sup>-1</sup>               | 2.31 × 10 <sup>19</sup>       |
|                          | Absorbance of UCNP solution at 976 nm                         | Abs <sub>976</sub>                  | -                                    | 0.0014                        |
|                          | Absorbed NIR photon flux                                      | J <sub>a</sub> <sup>NIR</sup>       | photon s <sup>-1</sup>               | 7.45 × 10 <sup>16</sup>       |
|                          | <b>Up-conversion QY</b>                                       | <b>Φ<sub>UC</sub></b>               | <b>-</b>                             | <b>0.54%</b>                  |
| Single NP power          | Laser beam section                                            |                                     | cm <sup>2</sup>                      | 9.6 × 10 <sup>-2</sup>        |
|                          | Laser beam volume inside the cell ("lamp")                    | v                                   | L                                    | 9.6 × 10 <sup>-5</sup>        |
|                          | Yb molar extinction coefficient at 976 nm                     | ε <sub>Yb</sub>                     | L mol <sup>-1</sup> cm <sup>-1</sup> | 3.1                           |
|                          | number of Yb atoms inside the beam volume                     | n <sub>Yb</sub>                     | atom                                 | 2.58 × 10 <sup>16</sup>       |
|                          | Total number of RE per nanoparticle (from XRD)                | N <sub>RE</sub>                     | atom NP <sup>-1</sup>                | 75490                         |
|                          | percentage of Yb                                              | p <sub>Yb</sub>                     | %                                    | 30                            |
|                          | percentage of Er                                              | p <sub>Er</sub>                     | %                                    | 2                             |
|                          | number of ytterbium per nanoparticle                          | N <sub>Yb</sub>                     | atom NP <sup>-1</sup>                | 22670                         |
|                          | number of erbium per nanoparticle                             | N <sub>Er</sub>                     | atom NP <sup>-1</sup>                | 1510                          |
|                          | number of NPs inside the laser beam                           | n <sub>NP</sub>                     | NP                                   | 1.14 × 10 <sup>2</sup>        |
|                          | emitted photons per erbium atom                               | J <sub>0</sub> /N <sub>Er</sub>     | photon s <sup>-1</sup>               | 0.24                          |
|                          | <b>number of emitted photons per NP's</b>                     | <b>J<sub>0</sub>/n<sub>NP</sub></b> | <b>photon s<sup>-1</sup></b>         | <b>350</b>                    |
|                          | <b>Power per NP's</b>                                         | <b>ϕ<sup>NP</sup></b>               | <b>W</b>                             | <b>1.29 × 10<sup>16</sup></b> |

## 11- References:

- (1) Sumi, T.; Takagi, Y.; Yagi, A.; Morimoto, M.; Irie, M. *Chemical Communications* **2014**, *50* (30), 3928–3930. <https://doi.org/10.1039/C4CC00396A>.
- (2) Li, Z.; Zhang, Y. *Nanotechnology* **2008**, *19* (34), 345606. <https://doi.org/doi:10.1088/0957-4484/19/34/345606>.
- (3) Zhai, X.; Wang, Y.; Liu, X.; Liu, S.; Lei, P.; Yao, S.; Song, S.; Zhou, L.; Feng, J.; Zhang, H. *ChemPhotoChem* **2017**, *1* (8), 369–375.
- (4) Aillet, T.; Loubiere, K.; Dechy-Cabaret, O.; Prat, L. *International Journal of Chemical Reactor Engineering* **2014**, *12* (1), 257–269. <https://doi.org/10.1515/ijcre-2013-0121>.
